# Supplementary material for: Six weeks of Jilin ginseng root supplementation attenuates drop jump-related muscle injury markers in healthy female college students
Source: Royal Society of Chemistry journal article supplement (doi:10.1039/d0fo03146a), 2021-01-01
Supplement: d0fo03146a1.pdf [file d0fo03146a1.pdf]

**Supplementary Table 1.** Biochemical analysis with pre-test of placebo and GS supplementation

| <b>Parameter</b> | <b>Placebo</b> | <b>GS</b>      | <b><i>p</i>-value</b> |
|------------------|----------------|----------------|-----------------------|
| AST (IU/L)       | 17.29 ± 5.64   | 16.53 ± 1.54   | 0.6855                |
| ALT (IU/L)       | 8.33± 4.28     | 8.41 ± 1.61    | 0.9527                |
| CK (U/L)         | 69.91 ± 11.46  | 65.56 ± 9.12   | 0.3600                |
| ALB (g/dL)       | 4.46 ± 0.19    | 4.60 ± 0.25    | 0.1725                |
| ALP ( IU/L)      | 72.83±12.83    | 73.13 ± 14.82  | 0.9619                |
| TP (g/L)         | 75.57± 3.00    | 74.91 ± 4.23   | 0.1611                |
| GLU (mg/dL)      | 77.98± 7.49    | 78.53± 6.64    | 0.8625                |
| TC (mg/dL)       | 158.25±15.39   | 152.55 ± 22.34 | 0.5150                |
| TG (mg/dL)       | 81.91 ± 46.72  | 78.20 ± 25,88  | 0.8285                |
| HDL (mg/dL)      | 53.08± 6.32    | 53.54 ±8.81    | 0.8938                |
| LDL (mg/dL)      | 99.91 ± 9.86   | 100.67 ± 16.67 | 0.9019                |

Data are mean ± SD, n = 10 subjects/group. The subjects will assess 6-week placebo or GS supplementation. The statistical analysis was a one-way ANOVA, and *p* values of <0.05 were considered to significantly differ. AST, aspartate aminotransferase; ALT, alanine aminotransferase; CK, creatine kinase; ALB, albumin; ALP, alkaline phosphatase; TP, total protein; GLU, glucose; TC, total cholesterol; TG, triglycerides; HDL, high-density lipoprotein; LDL, low-density lipoprotein
